# Supplementary material
Source: publisher figshare collection journal article supplement (https://karger.figshare.com/articles/dataset/_/5127508)
Supplement: Supplementary file 1 [file 1 › 000371399_sm_Tables.docx]

**Supplementary table 1**. Results of filtering of whole exome sequencing data. 36 variants were identified that were homozygous, rare in public databases, and may change the protein sequence. Of those, a few (in bold) have suggestive *in silico* evaluation (conservation, prediction), and six (grey background) are located in a candidate region. Taking into account *in silico* analyses and phenotype revealed *MAN1B1* (in frame) as the only candidate mutation.

| **Variant** | | | | | | **Function** | | | | **Frequency** | | | **in silico** | | | | | |
| --- | --- | --- | --- | --- | --- | --- | --- | --- | --- | --- | --- | --- | --- | --- | --- | --- | --- | --- |
| **Chr** | **Pos** | **Ref** | **Nov** | **Ref** | **Nov** | **Gene** | **NM #** | **cDNA** | **Protein** | **EVS** | **TG2012** | **in house** | **PhyloP** | **GERPpp** | **PolyPhen2** | **MutTast** | **MutAss** | **CADD** |
|  |  |  |  |  |  |  |  |  |  |  |  |  |  |  |  |  |  |  |
| **chr1** | **115222943** | **G** | **C** | **0** | **52** | **AMPD1** | **NM_001172626** | **c.C791G** | **p.P264R** | **0.000077** | **0** | **0** | **0.861** | **4.17** | **P** | **D** | **medium** | **19.77** |
| **chr1** | **151819879** | **G** | **A** | **0** | **41** | **THEM5** | **NM_182578** | **c.C712T** | **p.Q238X** | **0** | **0** | **0** | **2.627** | **5.25** |  | **D** |  | **33** |
| chr3 | 123633990 | G | A | 0 | 20 | CCDC14 | NM_022757 | c.C2375T | p.S792F | 0.000615 | 0.0005 | 0,004297994 | 0.566 | 2.37 | P | D | low | 7.321 |
| chr3 | 126747020 | G | A | 0 | 5 | PLXNA1 | NM_032242 | c.4510-4G>A | splicing | 0.003614 | 0.01 | 0 |  |  |  |  |  | 0.171 |
| chr3 | 136002792 | A | C | 2 | 71 | PCCB | NM_000532 | c.654+3A>C | splicing | 0.000154 | 0 | 0 |  |  |  |  |  | 14.15 |
| chr5 | 68689175 | T | C | 0 | 6 | RAD17 | NM_133343 | c.1276-6T>C | splicing | 0 | 0 | 0 |  |  |  |  |  | 10.89 |
| chr8 | 2954415 | G | C | 0 | 17 | CSMD1 | NM_033225 | c.C7094G | p.T2365R | 0 | 0 | 0 | -0.268 | 0.197 | B | N | low | 5.155 |
| **chr9** | **139995540** | **C** | **T** | **0** | **53** | **MAN1B1** | **NM_016219** | **c.C1000T** | **p.R334C** | **0** | **0** | **0** | **2.667** | **5.65** | **D** | **D** | **high** | **24.4** |
| **chr10** | **61956011** | **C** | **T** | **0** | **17** | **ANK3** | **NM_001204404** | **c.1738-10G>A** | **splicing** | **0.000231** | **0** | **0.005731** |  |  |  |  |  | **21.3** |
| chr10 | 68040337 | G | C | 0 | 37 | CTNNA3 | NM_001127384 | c.C1775G | p.A592G | 0 | 0 | 0 | 1.407 | 4.74 | D | N | medium | 11.16 |
| chr10 | 70645302 | A | G | 0 | 60 | STOX1 | NM_001130161 | c.A1750G | p.S584G | 0.000083 | 0 | 0 | 0.449 | 3.45 | B | N | low | 1.372 |
| chr10 | 72434651 | G | A | 0 | 28 | ADAMTS14 | NM_080722 | c.G422A | p.R141Q | 0 | 0 | 0 | -0.741 | -3.39 | B | N | neutral | 10.56 |
| chr11 | 15260600 | G | A | 0 | 10 | INSC | NM_001031853 | c.G1514A | p.R505Q | 0 | 0 | 0 | 0.321 | 2.75 | B | N | neutral | 9.943 |
| **chr11** | **34182626** | **C** | **T** | **0** | **11** | **ABTB2** | **NM_145804** | **c.G2221A** | **p.V741I** | **0** | **0** | **0** | **2.401** | **4.23** | **B** | **D** | **low** | **16.61** |
| **chr11** | **47644269** | **C** | **T** | **2** | **16** | **MTCH2** | **NM_014342** | **c.G809A** | **p.C270Y** | **0.001385** | **0.0009** | **0.01** | **1.464** | **4.9** | **B** | **N** | **neutral** | **15.78** |
| chr11 | 49075471 | G | A | 1 | 25 | TRIM64C | NM_001206631 | c.C1148T | p.T383M | 0 | 0 | 0 | -2.526 | -3.11 |  |  | neutral | 0.168 |
| **chr11** | **55861307** | **A** | **T** | **0** | **9** | **OR8I2** | **NM_001003750** | **c.A524T** | **p.H175L** | **0** | **0** | **0.005731** | **0.603** | **3.16** | **B** | **D** | **high** | **15.2** |
| chr11 | 61730295 | G | A | 0 | 29 | BEST1 | NM_001139443 | c.G1489A | p.E497K | 0.000308 | 0 | 0.001432 | -0.528 | -4.29 | B | N | neutral | 12.44 |
| **chr11** | **68179074** | **C** | **T** | **0** | **6** | **LRP5** | **NM_002335** | **c.C2489T** | **p.S830L** | **0** | **0** | **0** | **2.554** | **4.63** | **D** | **D** | **medium** | **26.2** |
| chr11 | 128442945 | G | A | 0 | 9 | ETS1 | NM_001143820 | c.69+12C>T | splicing | 0 | 0 | 0 |  |  |  |  |  | 6.094 |
| chr13 | 113882307 | T | C | 1 | 21 | CUL4A | NM_001008895 | c.T386C | p.V129A | 0.006689 | 0.0037 | 0.00430 | 2.058 | 5.12 | B | D | medium | 11.4 |
| **chr16** | **88747582** | **G** | **A** | **0** | **15** | **SNAI3** | **NM_178310** | **c.C617T** | **p.T206M** | **0.000077** | **0** | **0** | **2.337** | **4.73** | **D** | **D** | **medium** | **25.4** |
| chr17 | 49280490 | C | T | 1 | 12 | MBTD1 | NM_017643 | c.828+11G>A | splicing | 0 | 0 | 0 |  |  |  |  |  | 7.173 |
| chr17 | 78319610 | C | T | 0 | 60 | RNF213 | NM_001256071 | c.C7475T | p.T2492M | 0 | 0 | 0.001432 | 2.819 | 5.42 | D | N | medium | 9.516 |
| **chr18** | **50451653** | **G** | **T** | **1** | **104** | **DCC** | **NM_005215** | **c.G898T** | **p.V300L** | **0** | **0** | **0** | **2.725** | **5.76** | **B** | **N** | **neutral** | **15.64** |
| chr19 | 52825420 | A | G | 2 | 14 | ZNF480 | NM_144684 | c.A917G | p.Q306R | 0.000077 | 0 | 0 | 1.078 | 2.34 | B | N | neutral | 7.462 |
| chr19 | 55831914 | G | A | 0 | 86 | TMEM150B | NM_001085488 | c.128+12C>T | splicing | 0.000944 | 0 | 0.0029 |  |  |  |  |  | 2.912 |
| **chr20** | **44439512** | **C** | **T** | **2** | **14** | **DNTTIP1** | **NM_052951** | **c.796-12C>T** | **splicing** | **0.000077** | **0** | **0.001432** |  |  |  |  |  | **31** |
| chrX | 3002638 | C | T | 1 | 25 | ARSF | NM_001201538 | c.C761T | p.T254M | 0.000095 | 0.0006 | 0 | -0.09 | 1.44 | D | N | medium | 4.981 |
| **chrX** | **10104754** | **C** | **T** | **1** | **25** | **WWC3** | **NM_015691** | **c.C2845T** | **p.R949C** | **0.002935** | **0.003** | **0.001432** | **2.432** | **5.75** | **D** | **D** | **medium** | **26.9** |
| **chrX** | **24521499** | **A** | **G** | **0** | **42** | **PDK3** | **NM_001142386** | **c.A376G** | **p.M126V** | **0.001515** | **0** | **0** | **2.018** | **5.97** | **P** | **D** | **low** | **19.74** |
| chrX | 32364136 | C | T | 0 | 15 | DMD | NM_004011 | c.G1487A | p.R496K | 0 | 0 | 0 | 2.464 | 5.85 | B | N | neutral | 12.99 |
| **chrX** | **63551542** | **G** | **C** | **0** | **15** | **MTMR8** | **NM_017677** | **c.C1247G** | **p.A416G** | **0** | **0** | **0** | **-0.408** | **-0.519** | **B** | **N** | **high** | **17.69** |
| **chrX** | **106359296** | **G** | **C** | **0** | **5** | **RBM41** | **NM_001171080** | **c.126-12C>G** | **splicing** | **0.000095** | **0** | **0** |  |  |  |  |  | **18.46** |
| chrX | 151092935 | C | T | 1 | 12 | MAGEA4 | NM_001011548 | c.C799T | p.P267S | 0 | 0.0006 | 0 | 1.467 | 2.37 | D | N | medium | 13.3 |
| **chrY** | **2847573** | **-** | **T** | **1** | **9** | **ZFY** | **NM_001145275** | **c.1715dupT** | **p.I572fs** | **0** | **0** | **0** |  |  |  |  |  |  |

**Supplementary table 2.** prevalence of *MAN1B1* mutations as revealed from the Exome Sequencing Project database (<http://evs.gs.washington.edu/EVS/>) with stringent filtering (coverage of > 20x, predicted as “damaging” by PolyPhen2, highly conserved)

| Chr:position | rs number | Alleles | Allele # | Read depth | cDNA change (NM_016219.4) | Protein change | Conservation (GERP) | PolyPhen 2 |
| --- | --- | --- | --- | --- | --- | --- | --- | --- |
| 9:139982530 | rs145777584 | T>C | C=1 | 242 | c.223T>C | p.W75R | 5.08 | 0.994 |
| 9:139992291 | rs145872821 | C>T | T=1 | 27 | c.632C>T | p.A211V | 4.85 | 1.0 |
| 9:139994193 | rs201673635 | A>G | G=1 | 219 | c.776A>G | p.H259R | 4.69 | 1.0 |
| 9:139994279 | rs138090529 | G>A | A=7 | 176 | c.862G>A | p.G288S | 4.79 | 1.0 |
| 9:139994283 | rs373804871 | T>C | C=1 | 176 | c.866T>C | p.L289P | 4.79 | 1.0 |
| 9:139994285 | rs376363238 | A>T | T=1 | 174 | c.868A>T | p.T290S | 4.79 | 1.0 |
| 9:139994294 | rs142518201 | G>A | A=1 | 165 | c.877G>A | p.D293N | 4.79 | 1.0 |
| 9:139994298 | rs144767615 | C>T | T=1 | 158 | c.881C>T | p.A294V | 4.79 | 1.0 |
| 9:139995553 | rs367593676 | G>C | C=1 | 99 | c.1013G>C | p.G338A | 4.75 | 1.0 |
| 9:139995583 | rs370807578 | A>G | G=1 | 93 | c.1043A>G | p.D348G | 5.65 | 1.0 |
| 9:139995951 | rs376873444 | C>T | T=1 | 88 | c.1081C>T | p.R361W | 5.38 | 1.0 |
| 9:139996009 | rs150891378 | G>A | A=1 | 69 | c.1139G>A | p.G380D | 4.46 | 0.998 |
| 9:139996050 | rs369551783 | A>G | G=2 | 51 | c.1180A>G | p.T394A | 4.59 | 0.957 |
| 9:139996099 | rs145477274 | G>A | A=2 | 31 | c.1229G>A | p.R410H | 4.85 | 1.0 |
| 9:140000608 | rs144289532 | A>G | G=2 | 45 | c.1286A>G | p.H429R | 4.03 | 0.977 |
| 9:140000619 | rs143450360 | G>T | T=3 | 48 | c.1297G>T | p.G433W | 5.16 | 1.0 |
| 9:140000709 | rs368901674 | G>T | T=1 | 26 | c.1387G>T | p.D463Y | 5.02 | 1.0 |
| 9:140000717 | unknown | del | del=1 | 24 | c.1396_1397del2 | p.Y466*fs*1 | 5.02 | - |
| 9:140001193 | rs138805753 | C>T | T=2 | 83 | c.1498C>T | p.R500W | 3.03 | 1.0 |
| 9:140001753 | rs370134279 | G>A | A=1 | 48 | c.1618G>A | p.G540S | 4.47 | 1.0 |
| 9:140001879 | rs142406504 | C>T | T=10 | 71 | c.1744C>T | p.R582C | 2.91 | 0.988 |
| 9:140001995 | rs370346164 | C>G | G=1 | 70 | c.1777C>G | p.H593D | 4.79 | 0.997 |
| 9:140002007 | rs374963946 | C>T | T=1 | 77 | c.1789C>T | p.R597W | 3.85 | 1.0 |
| 9:140002035 | rs140839701 | A>G | G=1 | 101 | c.1817A>G | p.Y606C | 4.26 | 1.0 |
| 9:140002043 | rs377707640 | C>T | T=1 | 103 | c.1825C>T | p.R609C | 5.19 | 1.0 |
| 9:140002113 | rs368503703 | G>A | A=1 | 88 | c.1895G>A | p.R632Q | 4.45 | 0.989 |
| 9:140002844 | rs369286439 | C>T | T=1 | 77 | c.1901C>T | p.P634L | 3.53 | 0.976 |
| 9:140002856 | rs201112296 | A>G | G=1 | 100 | c.1913A>G | p.Y638C | 2.97 | 1.0 |
| 9:140002930 | rs371136351 | G>A | A=1 | 195 | c.1987G>A | p.E663K | 5.44 | 1.0 |
| 9:140002963 | rs181795958 | G>A | A=1 | 222 | c.2020G>A | p.D674N | 5.44 | 1.0 |
