# Supplementary material
Source: publisher figshare collection journal article supplement (https://karger.figshare.com/articles/dataset/_/5127508)

## Supplementary figure 1

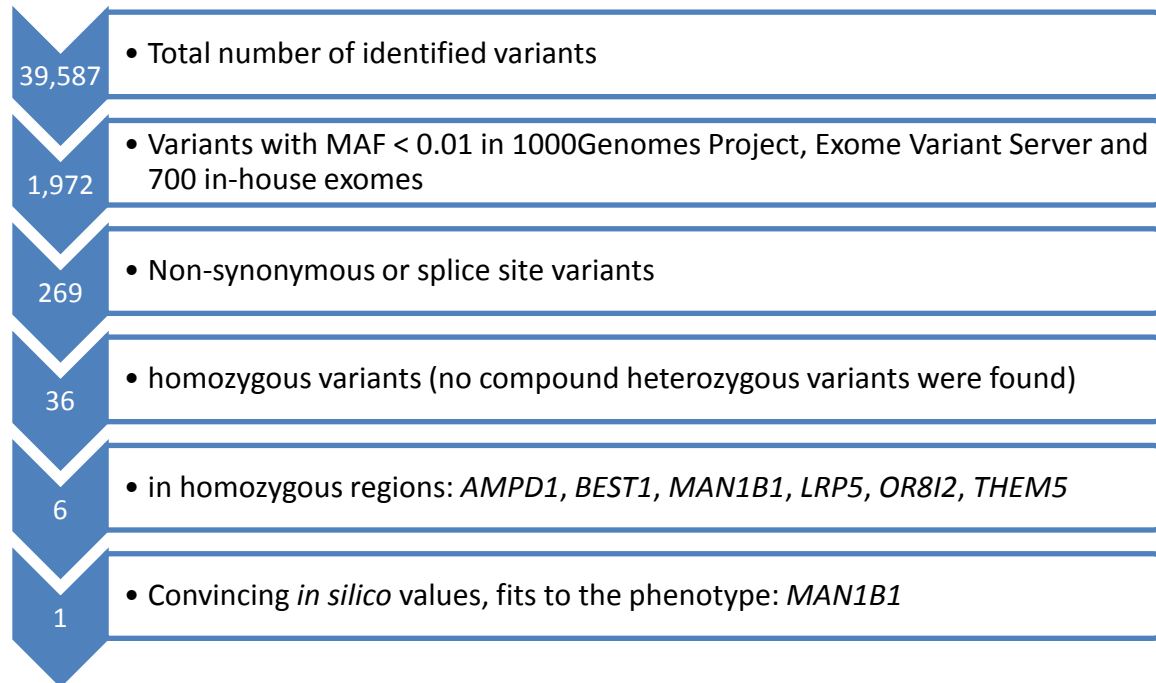

## **Supplementary figure 1 Titel.:**

### **Filtering of whole-exome sequencing data**

Supplement: Supplementary file 1 [file 1 › 000371399_sm_Figure.pdf]
